# Supplementary material
Source: PubMed Central journal article supplement (PMC2718353)
Supplement: 0900698106_ST3_PDF.pdf [file 0900698106_ST3_PDF.pdf]

### Supplementary Table 3.

Herbaria contributing tropical plant collections to Feeley & Silman, "Extinction risks of Amazonian plant species". All collections accessed through the Global Biodiversity and Information Facility ([www.gbif.org](http://www.gbif.org)) between 1/2008-2/2008.

1. Andes to Amazon Biodiversity Program
2. Arizona State University
3. Arizona State University Vascular Plant Herbarium
4. Australian National Herbarium (CANB)
5. BCCM/MUCL - (Agro) Industrial Fungi and Yeasts Collection
6. Belo Horizonte, Herbario
7. Benthic biodiversity along the central coast in the Brazilian EEZ (OBIS South America, BRAZIL)
8. BioCentro-UNELLEZ
9. Biologiezentrum Linz
10. BoGART
11. Botanische Staatssammlung Munchen
12. Botanischer Garten und Botanisches Museum Berlin-Dahlem, Zentraleinrichtung der Freien Universitat Berlin
13. Bryophyte herbarium, Gottingen (GOET)
14. CABI Bioscience Fungus Collection
15. CABI Bioscience Genetic Resource Collection
16. California Academy of Sciences
17. California State University, Chico
18. Canadian Museum of Nature Herbarium
19. Centre for Plant Biodiversity Research
20. CGN-PGR
21. CIBIO, Alicante:ABH-GBIF
22. CSIRO
23. DAO Herbarium Type Specimens
24. Database Schema for UC Davis [Herbarium Labels]
25. Database Schema for UC Davis [TGRC]
26. Desmidiaceae Engels
27. EMBRAPA
28. Embrapa Amazonia Oriental
29. EMBRAPA Recursos Geneticos e Biotecnologia - CENARGEN
30. EURISCO, The European Genetic Resources Search Catalogue
31. Fairchild Tropical Botanic Garden Virtual Herbarium Darwin Core format
32. Field Museum of Natural History
33. Flora of Japan Specimen Database
34. Florida Atlantic University
35. Forschungsinstitut Senckenberg
36. Friedrich-Schiller-Universitat Jena
37. Fruit and seed collection database

38. Fundacio CETEC
39. Gent University
40. Goteborg University
41. Gothenburg Herbarium - Types (GBIF:IH:GB:Herbarium)
42. Harvard University Herbaria
43. HBGSpermatophyta - Herbarium Hamburgense
44. HerbarImages
45. Herbario del Instituto de Ecologiaa, A.C., Mexico (IE-XAL)
46. Herbario Nacional de Bolivia
47. Herbario Universidad de MÃ;laga: MGC-CormÃ³fitos
48. Herbarium (UNA)
49. Herbarium Barroso
50. Herbarium Descoigns
51. Herbarium Fromm-Trinta
52. Herbarium GZU
53. Herbarium hermogenes
54. Herbarium Pederson
55. Herbarium S.C.H. Barrett
56. Herbarium Sigrid Liede
57. Herbarium Specimens of Museum of Nature and Human Activities, Hyogo Pref., Japan
58. Herbarium Stace
59. Herbarium Taylor
60. Herbarium Universitat Ulm
61. Herbarium Webster
62. Herbarium WU
63. Herbier de la Guyane
64. Ilha Solteira, Herbario
65. Institut Botanic de Barcelona, BC
66. Institut de Recherche pour le Developpement (IRD)
67. Institut fur Allgemeine Botanik
68. Instituto de Botanica
69. Instituto de Botanica Darwinion
70. Instituto de Botanica del Nordeste
71. Instituto de Pesquisas Cientificas e Tecnologicas do Estado do Amapa
72. Instituto Nacional de Pesquisas da Amazonia
73. Internation Botanical Collections (S)
74. IPK Genebank
75. Jardi Botanic de Valencia: VAL
76. Jardim Botânico do Rio de Janeiro
77. Johannes Gutenberg-Universitat
78. Lichen Herbarium Berlin
79. Lund Botanical Museum (LD)
80. Lund Botanical Museum (LD)(LD)
81. Manaus, Herbario da Universidade do Amazonas
82. MEXU/Coleccion de Briofitas
83. MEXU/Plantas Vasculares

84. Missouri Botanical Garden
85. Museo Ecuatoriano de Ciencias Naturales
86. Museu Botanico Municipal
87. Museu Paraense Emilio Goeldi
88. Museum National d'Histoire Naturelle, Paris
89. Nationaal Herbarium Nederland
90. Nationaal Herbarium Nederland - Leiden Branch
91. Nationaal Herbarium Nederland, Utrecht University branch
92. National Botanic Garden Belgium - Myxomycetes
93. National Museum in Prague
94. Naturhistorisches Museum Wien
95. NSW herbarium collection
96. Old Dominion University
97. Orchid Herbarium Collection
98. Paleobiology Database
99. Phanerogamie
100. Pontificia Universidad Catolica del Ecuador
101. Pontificia Universidad Catolica Madre y Maestra
102. Real Jardin Botanico (Madrid), Vascular Plant Herbarium (MA)
103. Real Jardin Botanico, Madrid: MA-Algae
104. Real Jardin Botanico, Madrid: MA-Fungi
105. Real Jardin Botanico, Madrid: MA-Hepat
106. Real Jardin Botanico, Madrid: MA-Musci
107. Royal Botanic Gardens, Kew
108. Royal Ontario Museum
109. Ruhr-Universitat Bochum
110. SANT herbarium vascular plant collection
111. SERNEC - University of North Carolina at Chapel Hill - Plants
112. Smithsonian Institution
113. Species of Eastern Brazil Vascular Plant Specimens
114. SysTax
115. Systematic Botany and Mycology Laboratory, USDA/ARS
116. The AAU Herbarium Database
117. The Deaver Herbarium, Northern Arizona University
118. The Natural History Museum
119. The System-wide Information Network for Genetic Resources (SINGER)
120. Type herbarium, Gottingen (GOET)
121. UCD BOTANICAL CONSERVATORY
122. ULNM
123. United States National Herbarium
124. United States National Plant Germplasm System Collection
125. Universidad de Buenos Aires
126. Universidad de Costa Rica
127. Universidad de Oviedo. Departamento de Biologia de Organismos y Sistemas: FCO
128. Universidad Nacional Autonoma de Mexico
129. Universidad Nacional de Colombia

130. Universidad Nacional de Loja
131. Universidad Politecnica de Madrid, Dpto. Biologia Vegetal, Banco de Germoplasma
132. Universidade de Brasilia
133. Universidade de Sao Paulo
134. Universidade Estadual de Campinas
135. Universidade Federal de Juiz de Fora
136. Universidade Federal de Mato Grosso
137. Universidade Federal de Santa Catarina
138. Universidade Federal do Maranhao
139. Universidade Federal do Parana
140. Universidade Federal do Rio Grande do Sul
141. Universitat Wien
142. University of Aarhus
143. University of Alabama
144. University of Calicut
145. University of California
146. University of California Botanical Garden DiGIR provider
147. University of Michigan
148. University of Texas at Austin
149. University of Victoria
150. University of Wisconsin Oshkosh
151. USDA
152. Vanderbilt University
153. Vascular Plant Collection - University of Washington Herbarium (WTU)
154. Vascular Plant Type Specimens
155. Wageningen University
156. Westfalische Wilhelms-Universitat
157. Yale Peabody Museum - Invertebrate Paleontology DiGIR provider service
